# Supplementary material
Source: publisher figshare collection journal article supplement (https://acs.figshare.com/ndownloader/files/4017568)
Supplement: Supplementary file 1 [file 4017568]

## **Supporting Information for**

### **Controlled Growth of Atomically Thin In<sub>2</sub>Se<sub>3</sub> Flakes by van der Waals Epitaxy**

Min Lin,<sup>1</sup> Di Wu,<sup>1</sup> Yu Zhou,<sup>1</sup> Wei Huang,<sup>2</sup> Wei Jiang,<sup>1</sup> Wenshan Zheng,<sup>1</sup> Shuli Zhao,<sup>1</sup> Chuanhong Jin,<sup>2</sup> Yunfan Guo,<sup>1</sup> Hailin Peng,<sup>1,\*</sup> and Zhongfan Liu,<sup>1,\*</sup>

<sup>1</sup> Center for Nanochemistry, Beijing National Laboratory for Molecular Sciences (BNLMS), State Key Laboratory for Structural Chemistry of Unstable and Stable Species, College of Chemistry and Molecular Engineering, Peking University, Beijing 100871, P. R. China

<sup>2</sup> State Key Laboratory of Silicon Materials, Key Laboratory of Advanced Materials and Applications for Batteries of Zhejiang Province, Department of Materials Science and Engineering, Zhejiang University, Hangzhou 310027, P. R. China

**\*Corresponding Author:** hlpeng@pku.edu.cn; zfliu@pku.edu.cn

## Part 1. Methods

### 1. Characterization of $\text{In}_2\text{Se}_3$ flakes

$\text{In}_2\text{Se}_3$  flakes were characterized by optical microscopy (OM, Olympus DX51 microscope), scanning electron microscopy (SEM, Hitachi S-4800, acceleration voltage 1-30 kV), atomic force microscopy (AFM, Veeco Nanoscope IIIa), transmission electron microscopy (TEM, FEI Tecnai F30, acceleration voltage 300 kV) equipped with an energy dispersive X-ray spectrometer (EDX). EDX Mapping analysis was taken on a Cs-corrected STEM (TitanG2 80-200 ChemiSTEM equipped with a Super-X EDX detector system), operated at 200 kV using a probe with 50 pA beam current and a converge angle of 21.4 mrad. Electrical measurements were performed in a Micromanipulator 6200 probe station with Keithley 4200 semiconductor analyzer.

### 2. Selective-area epitaxy of $\text{In}_2\text{Se}_3$ flakes

The freshly cleaved mica substrate spin-coated with a poly (methyl methacrylate) (PMMA) film was exposed to the xenon lamp for photolithography using a copper grid or a chrome patterned quartz template as the lithography masks. After exposure, the sample was treated by a developing solution (isopropanol and 4-methyl-2-pentanone, ratio 3:1) and fixing solution (isopropanol) for the development of the PMMA patterns. The mica substrate coated with PMMA patterns was then selectively modified by oxygen plasma etching (90 W, 5 mins). After the PMMA photoresist was removed by acetone and subsequent annealing in air at 550 °C for 30 minutes, as-pretreated mica substrates were loaded in the tube furnace for the selective-area epitaxy of  $\text{In}_2\text{Se}_3$  flakes. We found that  $\text{In}_2\text{Se}_3$  flakes prefer to nucleate and grow epitaxially on the intact mica region rather than the etched region since the chemical and morphological properties of mica are changed after selective-area oxygen plasma etching.

### 3. The transfer of $\text{In}_2\text{Se}_3$ flakes

The atomically thin  $\text{In}_2\text{Se}_3$  flakes grown on mica substrates can be transferred onto arbitrary substrates using a PMMA-mediated transfer technique.<sup>1</sup> The PMMA solution (MicroChem, 950 kg/mol, ~4 wt.% in anisole) was spin-coated onto  $\text{In}_2\text{Se}_3$ /mica at 2000 rpm for 1 min and baked at 170 °C for 5 mins to form a thin film that encapsulated  $\text{In}_2\text{Se}_3$  flakes. A sticky tape with a square hole in the middle was pasted on the surface of PMMA/ $\text{In}_2\text{Se}_3$ /mica, then dip into HF solution (~5%) for about 30 mins to etch away the mica substrate. The PMMA film supported by the sticky tape was attached to the target substrate. After the sticky tape was removed, the PMMA film was dissolved by acetone vapor, leaving the transferred  $\text{In}_2\text{Se}_3$  flakes on the target substrate (Figure S1A). Figure S1B and S1C show the morphology of  $\text{In}_2\text{Se}_3$  flakes grown on a mica substrate and after transferred on the  $\text{SiO}_2/\text{Si}$  substrate, respectively.

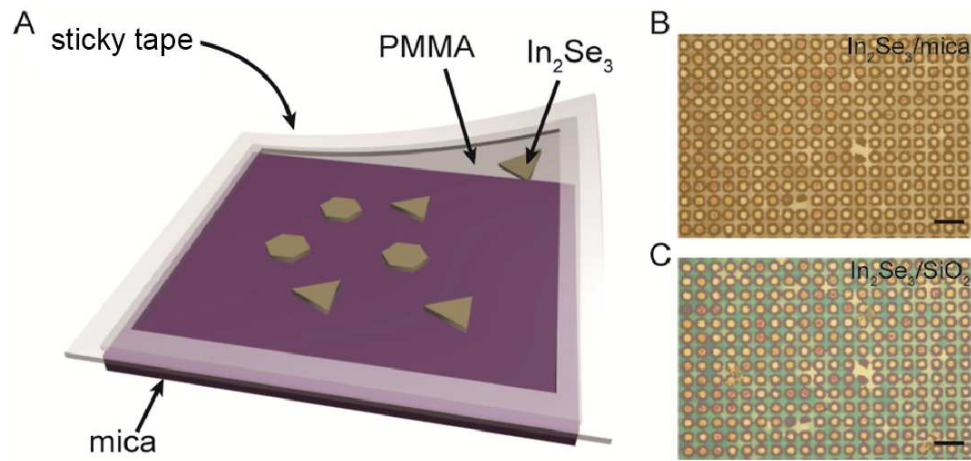

Figure S1. (A) Schematic diagram for the PMMA-mediated transfer technique. (B, C) Optical images of In<sub>2</sub>Se<sub>3</sub> flakes before and after transfer, respectively. Scale bars: 20  $\mu\text{m}$ .

#### 4. Device fabrication

The individual In<sub>2</sub>Se<sub>3</sub> flakes were transferred onto SiO<sub>2</sub> (300 nm)/Si substrates before electron beam lithography (EBL) was carried out to fabricate alignment markers and microelectrodes. Ohmic contact was made by In/Au (25 nm Cr and 50 nm Au) electrodes via thermal evaporation.

## Part 2. TEM and EDX results of $\text{In}_2\text{Se}_3$ flakes

The  $\text{In}_2\text{Se}_3$  flakes were transferred from mica to Cu grid according to the aforementioned method, and then were characterized by a transmission electron microscope (TEM) equipped with energy dispersive X-ray spectrometer (EDX). The elemental mapping images indicate that In and Se elements are uniformly distributed, confirming uniform chemical composition along the entire flake with a In/Se atomic ratio of 2:3 (Figure S2).

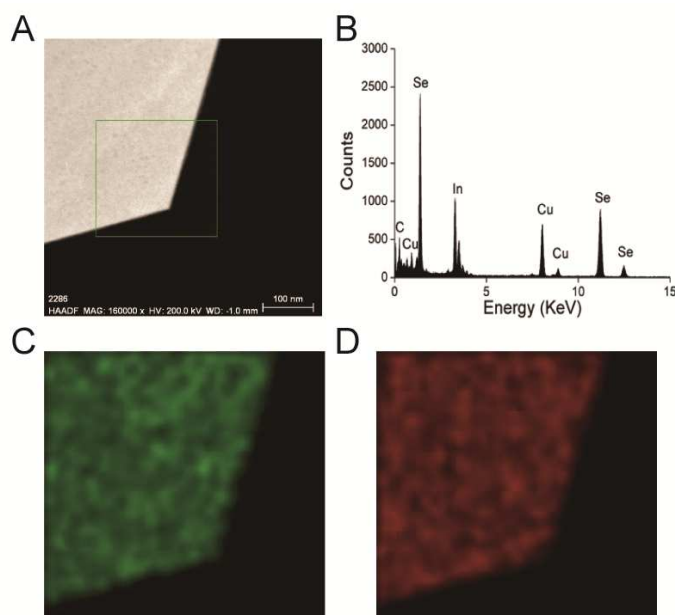

Figure S2. TEM characterization of  $\text{In}_2\text{Se}_3$  flakes. (A) TEM image of an  $\text{In}_2\text{Se}_3$  flake. (B) Typical EDX spectrum of the  $\text{In}_2\text{Se}_3$  flake. The Cu and C signals come from the TEM grid. (C, D) In and Se element maps of the corresponding  $\text{In}_2\text{Se}_3$  flake, respectively.

### Part 3. Phase transition of 2D layered $\text{In}_2\text{Se}_3$

We noticed that both the annealing and intensive electron beam irradiation can induce the phase transition of 2D  $\text{In}_2\text{Se}_3$  flakes. Superlattice-structured  $\text{In}_2\text{Se}_3$  could transform into simple hexagonal lattice structure after annealing in Ar gas at 300 °C. However, if an  $\text{In}_2\text{Se}_3$  flake with the simple hexagonal lattice structure was exposed to the intensive electron beam irradiation, its local structure can also change to the superlattice structure. Correspondingly, the electrical properties of  $\text{In}_2\text{Se}_3$  flake changed, depending on the crystal structure.

Figure S3A exhibits an  $I$ - $V$  curve of the superlattice-structured  $\text{In}_2\text{Se}_3$  flake with the resistance of  $9.5 \times 10^2 \Omega$ . From the  $I$ - $V$  curve of the same  $\text{In}_2\text{Se}_3$  flake after the annealing treatment at 300 °C (Figure S3B), the resistance changed to  $2.0 \times 10^8 \Omega$ , which increased 5~6 orders of magnitude. Interestingly, when the same sample was exposed to electron beam irradiation for a few seconds (Figure S3C), the resistance would decrease from  $2.0 \times 10^8 \Omega$  to  $2.7 \times 10^6 \Omega$ . We believe that the change of electric properties is related to the local structure of  $\text{In}_2\text{Se}_3$ .<sup>2</sup> The annealing treatment could induce a phase transition from superlattice structure to the simple hexagonal lattice of  $\text{In}_2\text{Se}_3$ , resulting in an increase of the resistance.<sup>2</sup> On the other hand, the intensive electric beam irradiation may induce the formation of superlattice phase, and thus increase the conductivity of  $\text{In}_2\text{Se}_3$ .

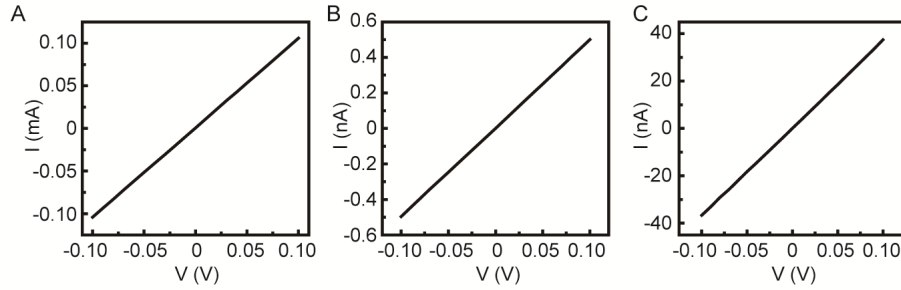

Figure S3. Phase transition of 2D  $\text{In}_2\text{Se}_3$  flakes induced by annealing and electron beam irradiation: (A) Two-probe I-V measurement of an  $\text{In}_2\text{Se}_3$  flake with a superlattice structure; (B) Two-probe I-V curve of the same  $\text{In}_2\text{Se}_3$  flake after annealing; (C) Two-probe I-V curve of the same  $\text{In}_2\text{Se}_3$  after annealing and electron beam irradiation.

## Part 4.

### The effect of incident light intensity on photoresponse

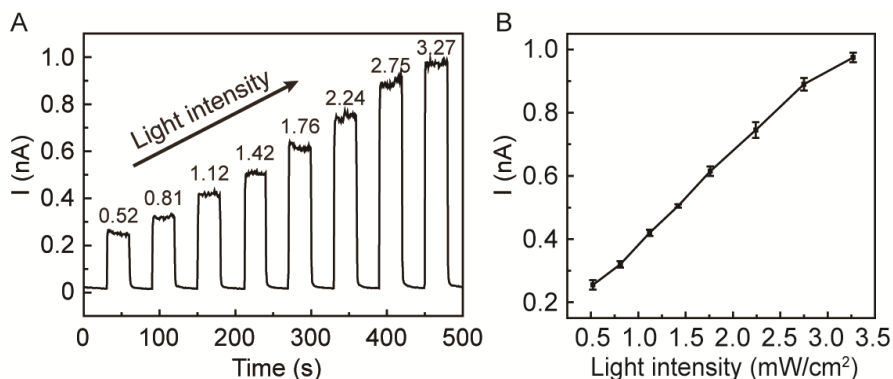

Figure S4. (A) Photocurrent of In<sub>2</sub>Se<sub>3</sub> flakes as a function of incident light density. (B) The output photocurrent change with incident light density.

From the photoresponse of In<sub>2</sub>Se<sub>3</sub> flakes shown in Figure S4A, we found that the output photocurrent increased when incident light intensity was increased from 0.52 to 3.27 mW/cm<sup>2</sup>. As shown in Figure S4B, the photocurrent is linearly proportional to the incident light intensity. The measured current is about 0.24 nA when the light intensity is 0.52 mW/cm<sup>2</sup>. Given the active area of  $\sim 18.4 \mu\text{m}^2$ , the corresponding photosensitivity of 2D In<sub>2</sub>Se<sub>3</sub> flake is calculated to be about 2.5 A/W.

#### Reference:

- (1) Jiao, L. Y.; Fan, B.; Xian, X. J.; Wu, Z. Y.; Zhang, J.; Liu, Z. F. *J. Am. Chem. Soc.* **2008**, *130*, 12612.
- (2) Lai, K. J.; Peng, H. L.; Kundhikanjana, W.; Schoen, D. T.; Xie, C.; Meister, S.; Cui, Y.; Kelly, M. A.; Shen, Z. X. *Nano Lett* **2009**, *9*, 1265.
